# Supplementary material for: Spectrum of thyroid dysfunction and dementia: a dose–response meta-analysis of 344,248 individuals from cohort studies
Source: PubMed Central journal article supplement — Endocr Connect. 2021 Mar 19;10(4):410–21. doi: 10.1530/EC-21-0047 (PMC8111311; doi:10.1530/ec-21-0047), 2021-03-19
Supplement: supplementary_material.pdf [file supplementary_material.pdf]

## Supplement information

### Search strategy

**STable 1.** Risk of bias assessment (Newcastle-Ottawa Quality Assessment Scale criteria).

**STable 2.** Meta-analysis data of the association between thyroid dysfunction and risk of dementia.

**STable 3.** Dose-response meta-analysis data of the association between TSH level and risk of dementia.

**SFigure 1.** The association between thyroid dysfunction and Alzheimer's disease.

Abbreviation: RR, ratio risk; CI, confidence interval.

Where I<sup>2</sup> is the variation in effect estimates attributable to heterogeneity, overall is the pooled fixed effect estimate of all studies. subtotal is the pooled fixed effects estimate of sub-group analysis studies. Weights are from fixed-effects analysis. %Weight is the weight assigned to each study, based on the inverse of the within- and between-study variance. The size of the grey boxes around the point estimates reflects the weight assigned to each study.

**SFigure 2.** Funnel plot of the impact of thyroid dysfunction on risk of dementia.

Abbreviations: RR, ratio ratio.

## Search strategy

Pubmed:

((((((((((((((((((((((((((((((((((("hyperthyroidism"[MeSH Terms] OR ((((((("hyperthyroidal"[All Fields] OR "hyperthyroidic"[All Fields]) OR "hyperthyroidism"[MeSH Terms]) OR "hyperthyroidism"[All Fields]) OR "hyperthyroid"[All Fields]) OR "hyperthyroids"[All Fields]) OR "hyperthyroidisms"[All Fields])) OR (((("euthyroid"[All Fields] OR "euthyroidal"[All Fields]) OR "euthyroidic"[All Fields]) OR "euthyroidism"[All Fields]) OR "euthyroids"[All Fields])) OR (((("euthyroid"[All Fields] OR "euthyroidal"[All Fields]) OR "euthyroidic"[All Fields]) OR "euthyroidism"[All Fields]) OR "euthyroids"[All Fields])) OR "hypothyroidism"[MeSH Terms]) OR ((((((("hypothyroidal"[All Fields] OR "hypothyroidic"[All Fields]) OR "hypothyroidism"[MeSH Terms]) OR "hypothyroidism"[All Fields]) OR "hypothyroid"[All Fields]) OR "hypothyroidisms"[All Fields]) OR "hypothyroids"[All Fields])) OR "thyroid dysfunction"[All Fields]) OR "thyroid disorder"[All Fields]) OR ("dysthyroidism"[All Fields] OR "dysthyroidisms"[All Fields])) OR "thyroid disease"[All Fields]) OR "Subclinical hyperthyroidism"[All Fields]) OR "subclinical hypothyroidism"[All Fields]) OR "subclinical dysthyroidism"[All Fields]) OR "subclinical thyroid"[All Fields]) OR "thyroxine"[MeSH Terms]) OR (((("thyroxine"[MeSH Terms] OR "thyroxine"[All Fields]) OR "thyroxin"[All Fields]) OR "thyroxines"[All Fields])) OR "TT4"[All Fields]) OR "total T4"[All Fields]) OR "T4"[All Fields]) OR "free thyroxine"[All Fields]) OR "FT4"[All Fields]) OR "triiodothyronine"[MeSH Terms]) OR (((("triiodothyronin"[All Fields] OR "triiodothyronine"[MeSH Terms]) OR "triiodothyronine"[All Fields]) OR "triiodothyronines"[All Fields])) OR "TT3"[All Fields]) OR "total T3"[All Fields]) OR "T3"[All Fields]) OR "free triiodothyronine"[All Fields]) OR "FT3"[All Fields]) OR "thyrotropin"[MeSH Terms]) OR (((("thyrotropin"[MeSH Terms] OR "thyrotropin"[All Fields]) OR "thyrotropine"[All Fields]) OR "thyrotropins"[All Fields])) OR "TSH"[All Fields]) OR "thyroid stimulation hormone"[All Fields]) OR "thyroid stimulating hormone"[All Fields]) OR "thyroid hormones"[MeSH Terms]) OR "thyroid hormones"[All Fields]) OR "thyroid hormone"[All Fields]) AND (((("dementia"[MeSH Terms] OR (((("dementia"[MeSH Terms] OR "dementia"[All Fields]) OR "dementias"[All Fields]) OR "dementia s"[All Fields])) ) OR "Alzheimer's disease"[All Fields]) OR (((((((("alzheimer s"[All Fields] OR "alzheimer disease"[MeSH Terms]) OR ("alzheimer"[All Fields] AND "disease"[All Fields])) OR "alzheimer

disease"[All Fields]) OR "alzheimer"[All Fields]) OR "alzheimer s"[All Fields]) OR "alzheimers"[All Fields]) OR "alzheimers s"[All Fields]))

Embase:

(hyperthyroidism OR euthyroidism OR euthyroid OR hypothyroidism OR 'thyroid dysfunction' OR 'thyroid disorder' OR dysthyroidism OR 'thyroid disease' OR 'subclinical hyperthyroidism' OR 'subclinical hypothyroidism' OR 'subclinical dysthyroidism' OR 'subclinical thyroid' OR thyroxine OR tt4 OR 'total t4' OR t4 OR 'free thyroxine' OR ft4 OR triiodothyronine OR tt3 OR 'total t3' OR t3 OR 'free triiodothyronine' OR ft3 OR thyrotropin OR tsh OR 'thyroid stimulation hormone' OR 'thyroid stimulating hormone' OR 'thyroid hormones' OR 'thyroid hormone') AND (dementia OR 'alzheimer disease' OR alzheimer)

#1 AND 'human'/de AND 'article'/it

Web of science

(hyperthyroidism OR euthyroidism OR euthyroid OR hypothyroidism OR 'thyroid dysfunction' OR 'thyroid disorder' OR dysthyroidism OR 'thyroid disease' OR 'subclinical hyperthyroidism' OR 'subclinical hypothyroidism' OR 'subclinical dysthyroidism' OR 'subclinical thyroid' OR thyroxine OR tt4 OR 'total t4' OR t4 OR 'free thyroxine' OR ft4 OR triiodothyronine OR tt3 OR 'total t3' OR t3 OR 'free triiodothyronine' OR ft3 OR thyrotropin OR tsh OR 'thyroid stimulation hormone' OR 'thyroid stimulating hormone' OR 'thyroid hormones' OR 'thyroid hormone') AND (dementia OR 'alzheimer disease' OR alzheimer)
