# Supplementary material for: Spectrum of thyroid dysfunction and dementia: a dose–response meta-analysis of 344,248 individuals from cohort studies
Source: PubMed Central journal article supplement — Endocr Connect. 2021 Mar 19;10(4):410–21. doi: 10.1530/EC-21-0047 (PMC8111311; doi:10.1530/ec-21-0047), 2021-03-19
Supplement: supplementary_table_1.pdf [file supplementary_table_1.pdf]

**STable 1.** Risk of bias assessment (Newcastle-Ottawa Quality Assessment Scale criteria).

| Study            | Selection                                |                                     | Comparability             |                                                                                  |                                                                     | Outcome                  |                                                  |                               | Quality score |
|------------------|------------------------------------------|-------------------------------------|---------------------------|----------------------------------------------------------------------------------|---------------------------------------------------------------------|--------------------------|--------------------------------------------------|-------------------------------|---------------|
|                  | Representativeness of the exposed cohort | Selection of the non-exposed cohort | Ascertainment of exposure | Demonstration that the outcome of interest was not present at start of the study | Comparability of cohorts on the basis of the design or the analysis | Ascertainment of outcome | Was follow-up long enough for outcomes to occur? | Adequacy of follow-up cohorts |               |
| Kalmijin (2000)  | *                                        | *                                   | *                         | *                                                                                | **                                                                  | *                        | /                                                | *                             | 8             |
| Annerbo (2006)   | /                                        | /                                   | *                         | *                                                                                | **                                                                  | *                        | *                                                | *                             | 7             |
| de Jong (2006)   | *                                        | *                                   | *                         | *                                                                                | *                                                                   | *                        | *                                                | *                             | 8             |
| Tan (2008)       | *                                        | *                                   | *                         | *                                                                                | **                                                                  | *                        | *                                                | *                             | 9             |
| Annerbo (2009)   | /                                        | /                                   | *                         | *                                                                                | **                                                                  | *                        | *                                                | *                             | 7             |
| de Jong (2009)   | /                                        | *                                   | *                         | *                                                                                | **                                                                  | *                        | /                                                | *                             | 7             |
| Vadivelo (2011)  | *                                        | *                                   | *                         | *                                                                                | **                                                                  | *                        | *                                                | *                             | 9             |
| Forti (2012)     | *                                        | *                                   | /                         | *                                                                                | **                                                                  | *                        | /                                                | *                             | 7             |
| Yeap (2012)      | /                                        | *                                   | *                         | *                                                                                | **                                                                  | *                        | *                                                | *                             | 8             |
| Formiga (2014)   | /                                        | *                                   | *                         | *                                                                                | /                                                                   | *                        | /                                                | *                             | 5             |
| Moon (2014)      | /                                        | *                                   | *                         | *                                                                                | **                                                                  | *                        | *                                                | *                             | 8             |
| Cappola (2015)   | *                                        | *                                   | *                         | *                                                                                | **                                                                  | *                        | *                                                | *                             | 9             |
| Chaker (2016)    | *                                        | *                                   | *                         | *                                                                                | **                                                                  | *                        | *                                                | *                             | 9             |
| Aubert (2017)    | *                                        | *                                   | *                         | *                                                                                | **                                                                  | *                        | *                                                | *                             | 9             |
| George (2019)    | *                                        | *                                   | *                         | *                                                                                | **                                                                  | *                        | *                                                | *                             | 9             |
| Quinlan (2019)   | /                                        | *                                   | *                         | *                                                                                | *                                                                   | *                        | /                                                | *                             | 6             |
| Folkestad (2020) | *                                        | *                                   | *                         | *                                                                                | **                                                                  | *                        | *                                                | *                             | 9             |
