# Supplementary material for: Spectrum of thyroid dysfunction and dementia: a dose–response meta-analysis of 344,248 individuals from cohort studies
Source: PubMed Central journal article supplement — Endocr Connect. 2021 Mar 19;10(4):410–21. doi: 10.1530/EC-21-0047 (PMC8111311; doi:10.1530/ec-21-0047), 2021-03-19
Supplement: supplementary_table_2.pdf [file supplementary_table_2.pdf]

**STable 2.** Meta-analysis data of the association between thyroid dysfunction and risk of dementia.

| study      | year | thyroid status              | number of abnormal thyroid status (dementia) | number of normal thyroid status (dementia) | RR   | LL   | UL    |
|------------|------|-----------------------------|----------------------------------------------|--------------------------------------------|------|------|-------|
| Kalmijin   | 2000 | subclinical hyperthyroidism | 102 (5)                                      | 1560 (19)                                  | 3.50 | 1.20 | 10.00 |
| Kalmijin   | 2000 | subclinical hypothyroidism  | 170 (1)                                      | 1560 (19)                                  | 0.50 | 0.10 | 3.80  |
| de Jong    | 2006 | subclinical hypothyroidism  | 20 (3)                                       | 918 (53)                                   | 1.28 | 0.39 | 4.23  |
| de Jong    | 2006 | subclinical hyperthyroidism | 87 (8)                                       | 918 (53)                                   | 1.13 | 0.51 | 2.52  |
| de Jong    | 2009 | subclinical hyperthyroidism | 22 (5)                                       | 527 (76)                                   | 1.58 | 0.71 | 3.50  |
| de Jong    | 2009 | subclinical hypothyroidism  | 19 (2)                                       | 527 (76)                                   | 0.73 | 0.19 | 2.75  |
| Vadivelloo | 2011 | subclinical hyperthyroidism | 2004 (53)                                    | 10111 (151)                                | 1.64 | 1.20 | 2.25  |
| Forti      | 2012 | subclinical hypothyroidism  | 135 (24)                                     | 525 (62)                                   | 1.51 | 0.98 | 2.32  |
| Yeap       | 2012 | subclinical hypothyroidism  | 364 (13)                                     | 3018 (132)                                 | 0.82 | 0.47 | 1.43  |
| Yeap       | 2012 | subclinical hyperthyroidism | 19 (0)                                       | 3018 (132)                                 | 0.57 | 0.04 | 8.84  |
| Formiga    | 2014 | subclinical hyperthyroidism | 4 (1)                                        | 164 (39)                                   | 1.05 | 0.19 | 5.87  |
| Formiga    | 2014 | subclinical hypothyroidism  | 13 (5)                                       | 164 (39)                                   | 1.62 | 0.77 | 3.39  |
| Aubert     | 2017 | subclinical hyperthyroidism | 22 (7)                                       | 1026 (224)                                 | 2.41 | 1.45 | 5.10  |
| Aubert     | 2017 | subclinical hyperthyroidism | 55 (13)                                      | 1049 (248)                                 | 0.80 | 0.46 | 1.39  |
| Aubert     | 2017 | subclinical hypothyroidism  | 309 (59)                                     | 2075 (472)                                 | 0.89 | 0.68 | 1.17  |
| George     | 2019 | clinical hypothyroidism     | 281 (60)                                     | 10956 (1952)                               | 0.96 | 0.73 | 1.26  |
| George     | 2019 | subclinical hypothyroidism  | 581 (98)                                     | 10956 (1952)                               | 0.74 | 0.60 | 0.92  |
| George     | 2019 | subclinical hyperthyroidism | 429 (74)                                     | 10956 (1952)                               | 1.01 | 0.79 | 1.29  |
| George     | 2019 | clinical hyperthyroidism    | 234 (51)                                     | 10956 (1952)                               | 1.40 | 1.02 | 1.92  |
| Folkestad  | 2020 | clinical hyperthyroidism    | 1793 (105)                                   | 10756 (473)                                | 0.82 | 0.66 | 1.10  |
| Folkestad  | 2020 | subclinical hyperthyroidism | 445 (46)                                     | 10756 (473)                                | 1.57 | 1.16 | 2.13  |

**Abbreviation:** RR, ratio risk; LL, lower limit of 95% confidence interval; UL, upper limit of 95% confidence interval.
