# Supplementary material for: Spectrum of thyroid dysfunction and dementia: a dose–response meta-analysis of 344,248 individuals from cohort studies
Source: PubMed Central journal article supplement — Endocr Connect. 2021 Mar 19;10(4):410–21. doi: 10.1530/EC-21-0047 (PMC8111311; doi:10.1530/ec-21-0047), 2021-03-19
Supplement: supplementary_table_3.pdf [file supplementary_table_3.pdf]

**STable 3.** Dose-response meta-analysis data of the association between TSH level and risk of dementia.

| id             | year | doserange  | cases | total | RR   | LL   | UL   |
|----------------|------|------------|-------|-------|------|------|------|
| Kalmijin       | 2000 | <0.4       | 5     | 102   | 1    |      |      |
| Kalmijin       | 2000 | 0.4-4.0    | 19    | 1560  | 0.25 | 0.09 | 0.65 |
| Kalmijin       | 2000 | >4.0       | 1     | 170   | 0.12 | 0.01 | 1.01 |
| de Jong        | 2006 | <0.4       | 7     | 87    | 1    |      |      |
| de Jong        | 2006 | 0.4-4.3    | 53    | 918   | 0.72 | 0.34 | 1.53 |
| de Jong        | 2006 | >4.3       | 3     | 20    | 1.86 | 0.53 | 6.59 |
| Tan<br>(women) | 2008 | 0.1-1.1    | 42    | 280   | 1    |      |      |
| Tan<br>(women) | 2008 | 1.1-2.1    | 24    | 291   | 0.55 | 0.34 | 0.88 |
| Tan<br>(women) | 2008 | 2.1-9.9    | 39    | 278   | 0.94 | 0.63 | 1.4  |
| Tan (men)      | 2008 | 0.1-0.9    | 17    | 211   | 1    |      |      |
| Tan (men)      | 2008 | 0.9-1.8    | 16    | 187   | 1.06 | 0.55 | 2.04 |
| Tan (men)      | 2008 | 1.8-9.7    | 7     | 185   | 0.47 | 0.2  | 1.11 |
| de Jong        | 2009 | <0.4       | 5     | 22    | 1    |      |      |
| de Jong        | 2009 | 0.4-4.3    | 76    | 527   | 0.63 | 0.29 | 1.41 |
| de Jong        | 2009 | >4.3       | 2     | 19    | 0.46 | 0.1  | 2.12 |
| Vadiveloo      | 2011 | <0.1       | 10    | 414   | 1    |      |      |
| Vadiveloo      | 2011 | 0.1-0.4    | 39    | 1491  | 1.08 | 0.55 | 2.15 |
| Vadiveloo      | 2011 | 0.4-4.0    | 151   | 10111 | 0.62 | 0.33 | 1.16 |
| Forti          | 2012 | 0.45-2.20  | 20    | 220   | 1    |      |      |
| Forti          | 2012 | 2.20-3.59  | 29    | 223   | 1.43 | 0.83 | 2.45 |
| Forti          | 2012 | >3.59      | 37    | 217   | 1.88 | 1.13 | 3.13 |
| Yeap           | 2012 | <0.4       | 0.1   | 19    | 1    |      |      |
| Yeap           | 2012 | 0.4-4.0    | 132   | 3018  | 1.22 | 0.7  | 2.13 |
| Yeap           | 2012 | >4.0       | 13    | 364   | 1.98 | 0.99 | 3.93 |
| Formiga        | 2014 | <0.25      | 5     | 13    | 1    |      |      |
| Formiga        | 2014 | 0.25-5     | 39    | 164   | 0.62 | 0.29 | 1.3  |
| Formiga        | 2014 | >5         | 1     | 4     | 0.65 | 0.1  | 4.06 |
| Chaker         | 2016 | 0.41-1.28  | 166   | 2000  | 1    |      |      |
| Chaker         | 2016 | 1.29-1.80  | 113   | 1971  | 0.69 | 0.55 | 0.87 |
| Chaker         | 2016 | 1.81-2.48  | 116   | 2004  | 0.7  | 0.55 | 0.88 |
| Chaker         | 2016 | 2.49-3.99  | 101   | 1991  | 0.61 | 0.48 | 0.78 |
| Aubert         | 2017 | <0.1       | 7     | 22    | 1    |      |      |
| Aubert         | 2017 | 0.1-0.44   | 13    | 55    | 0.74 | 0.34 | 1.61 |
| Aubert         | 2017 | 0.45-4.49  | 248   | 1049  | 0.74 | 0.4  | 1.38 |
| Aubert         | 2017 | 4.50-19.99 | 59    | 309   | 0.6  | 0.31 | 1.15 |
| George         | 2017 | <0.56      | 125   | 663   | 1    |      |      |
| George         | 2017 | 0.56-5.1   | 1952  | 10956 | 0.94 | 0.8  | 1.11 |
| George         | 2017 | >5.1       | 158   | 862   | 0.97 | 0.79 | 1.2  |

**Abbreviation:** TSH, thyroid-stimulating hormone; RR, ratio risk; LL, lower limit of 95% confidence interval; UL, upper limit of 95% confidence interval.
