# Supplementary figures and images for: Spectrum of thyroid dysfunction and dementia: a dose–response meta-analysis of 344,248 individuals from cohort studies
Source: PubMed Central journal article supplement — Endocr Connect. 2021 Mar 19;10(4):410–21. doi: 10.1530/EC-21-0047 (PMC8111311; doi:10.1530/ec-21-0047), 2021-03-19

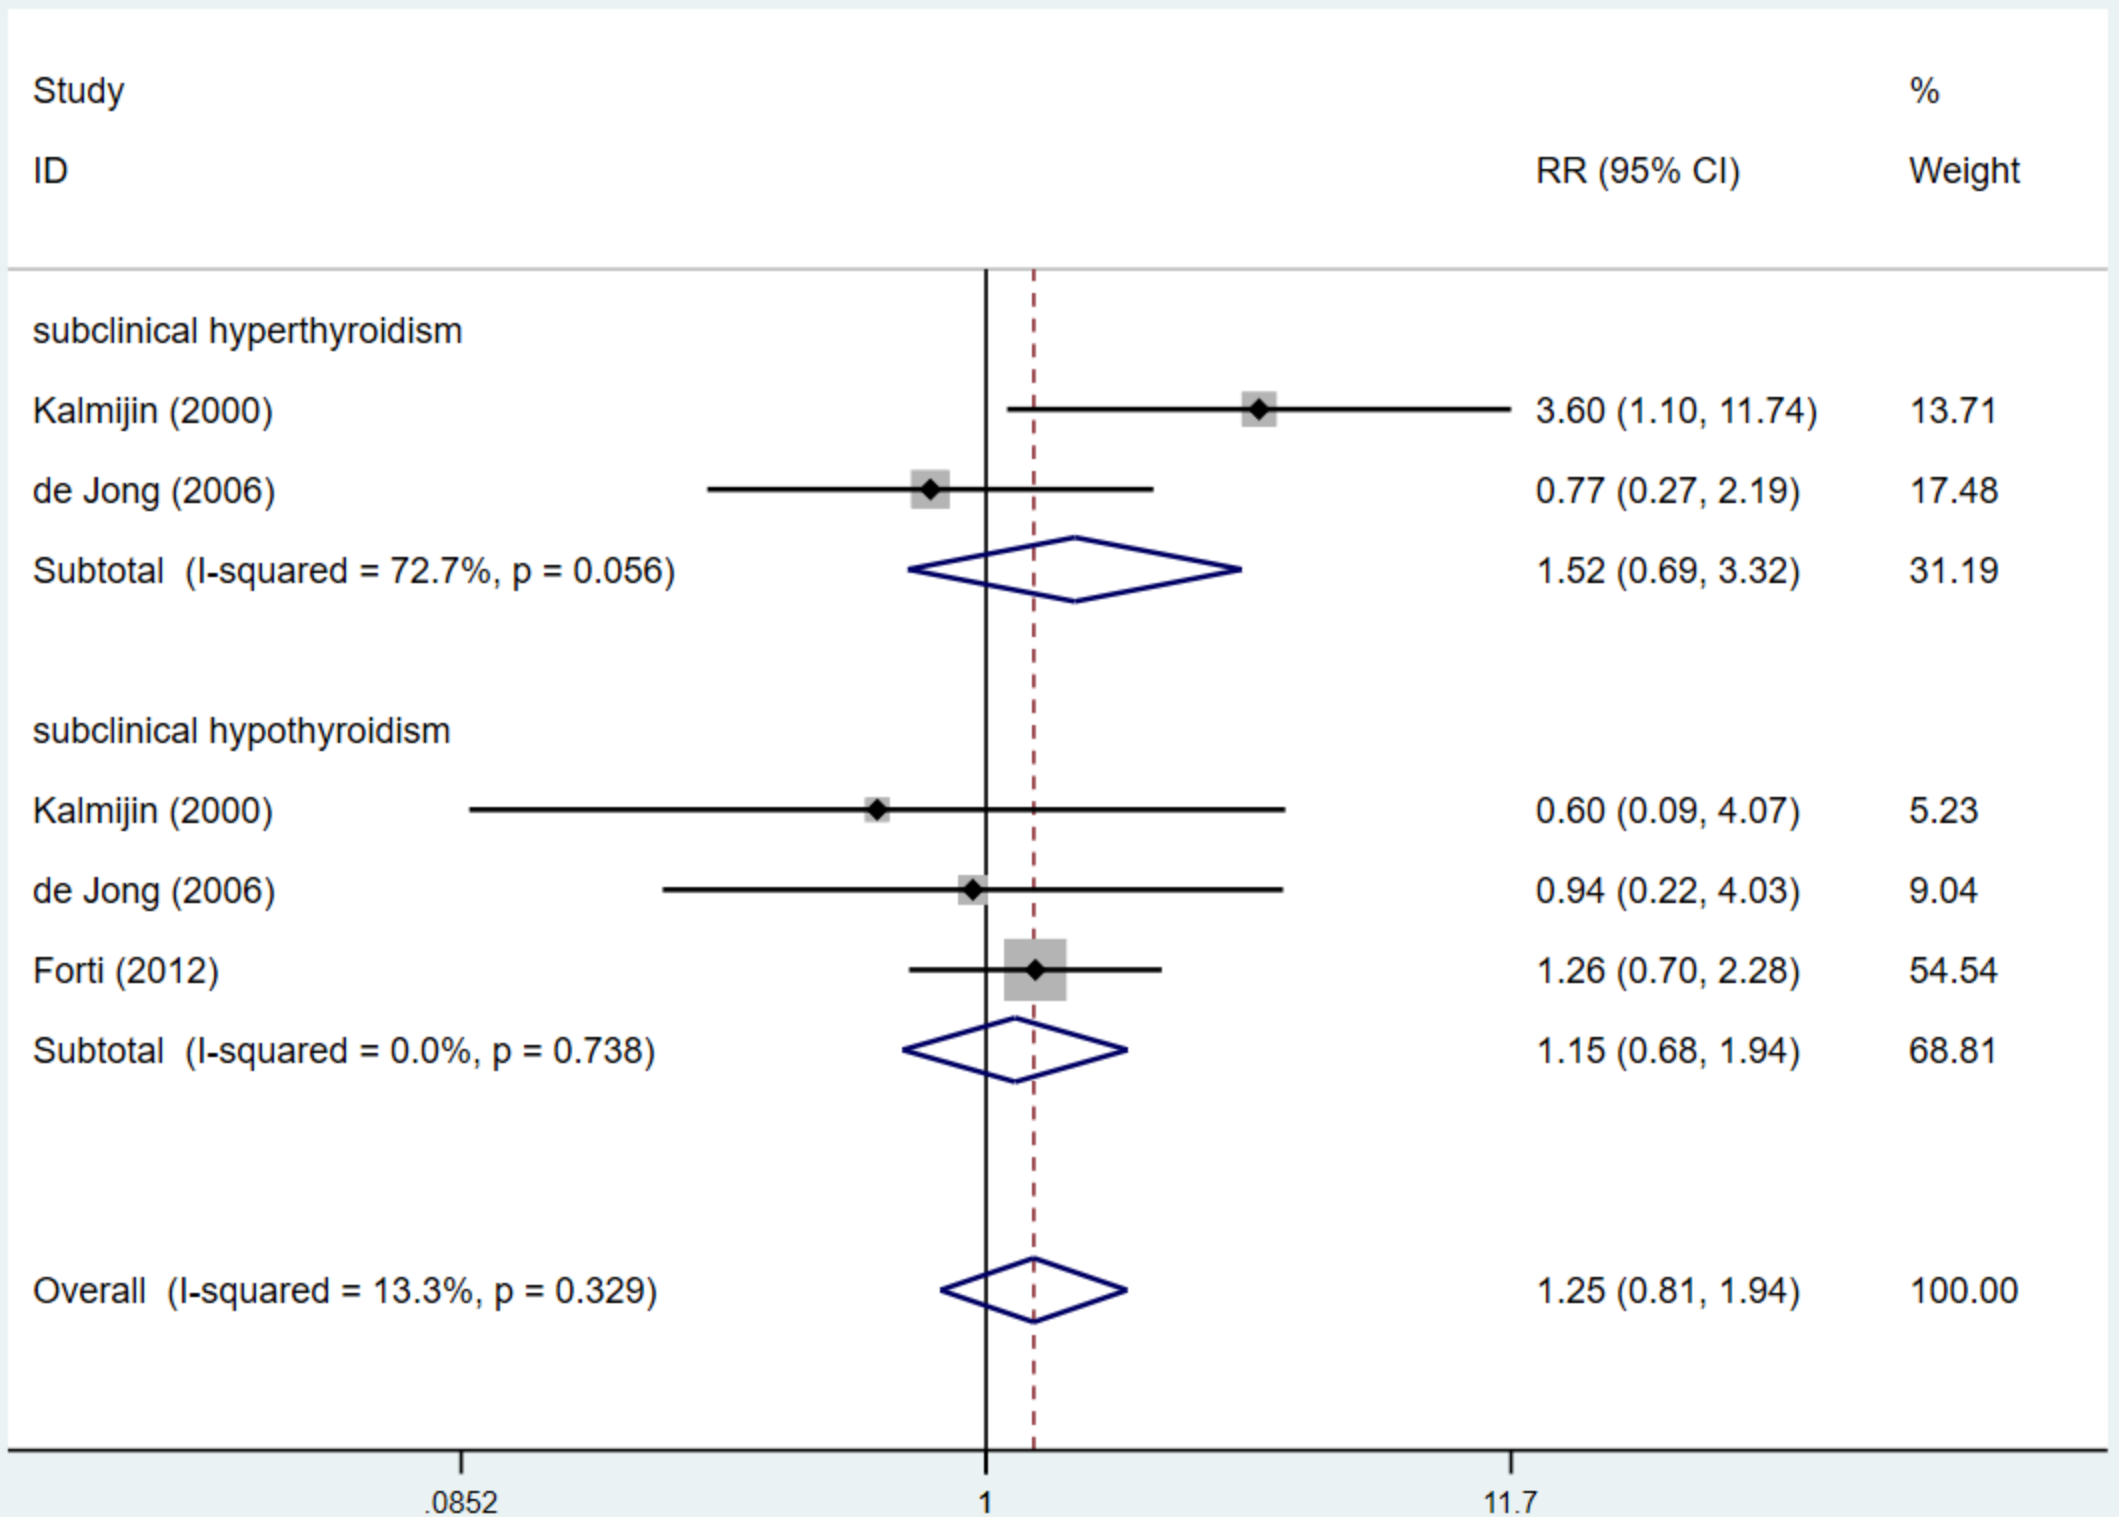

Supplement: supplementary_figure_1.pdf [file supplementary_figure_1.pdf]

Funnel plot with pseudo 95% confidence limits

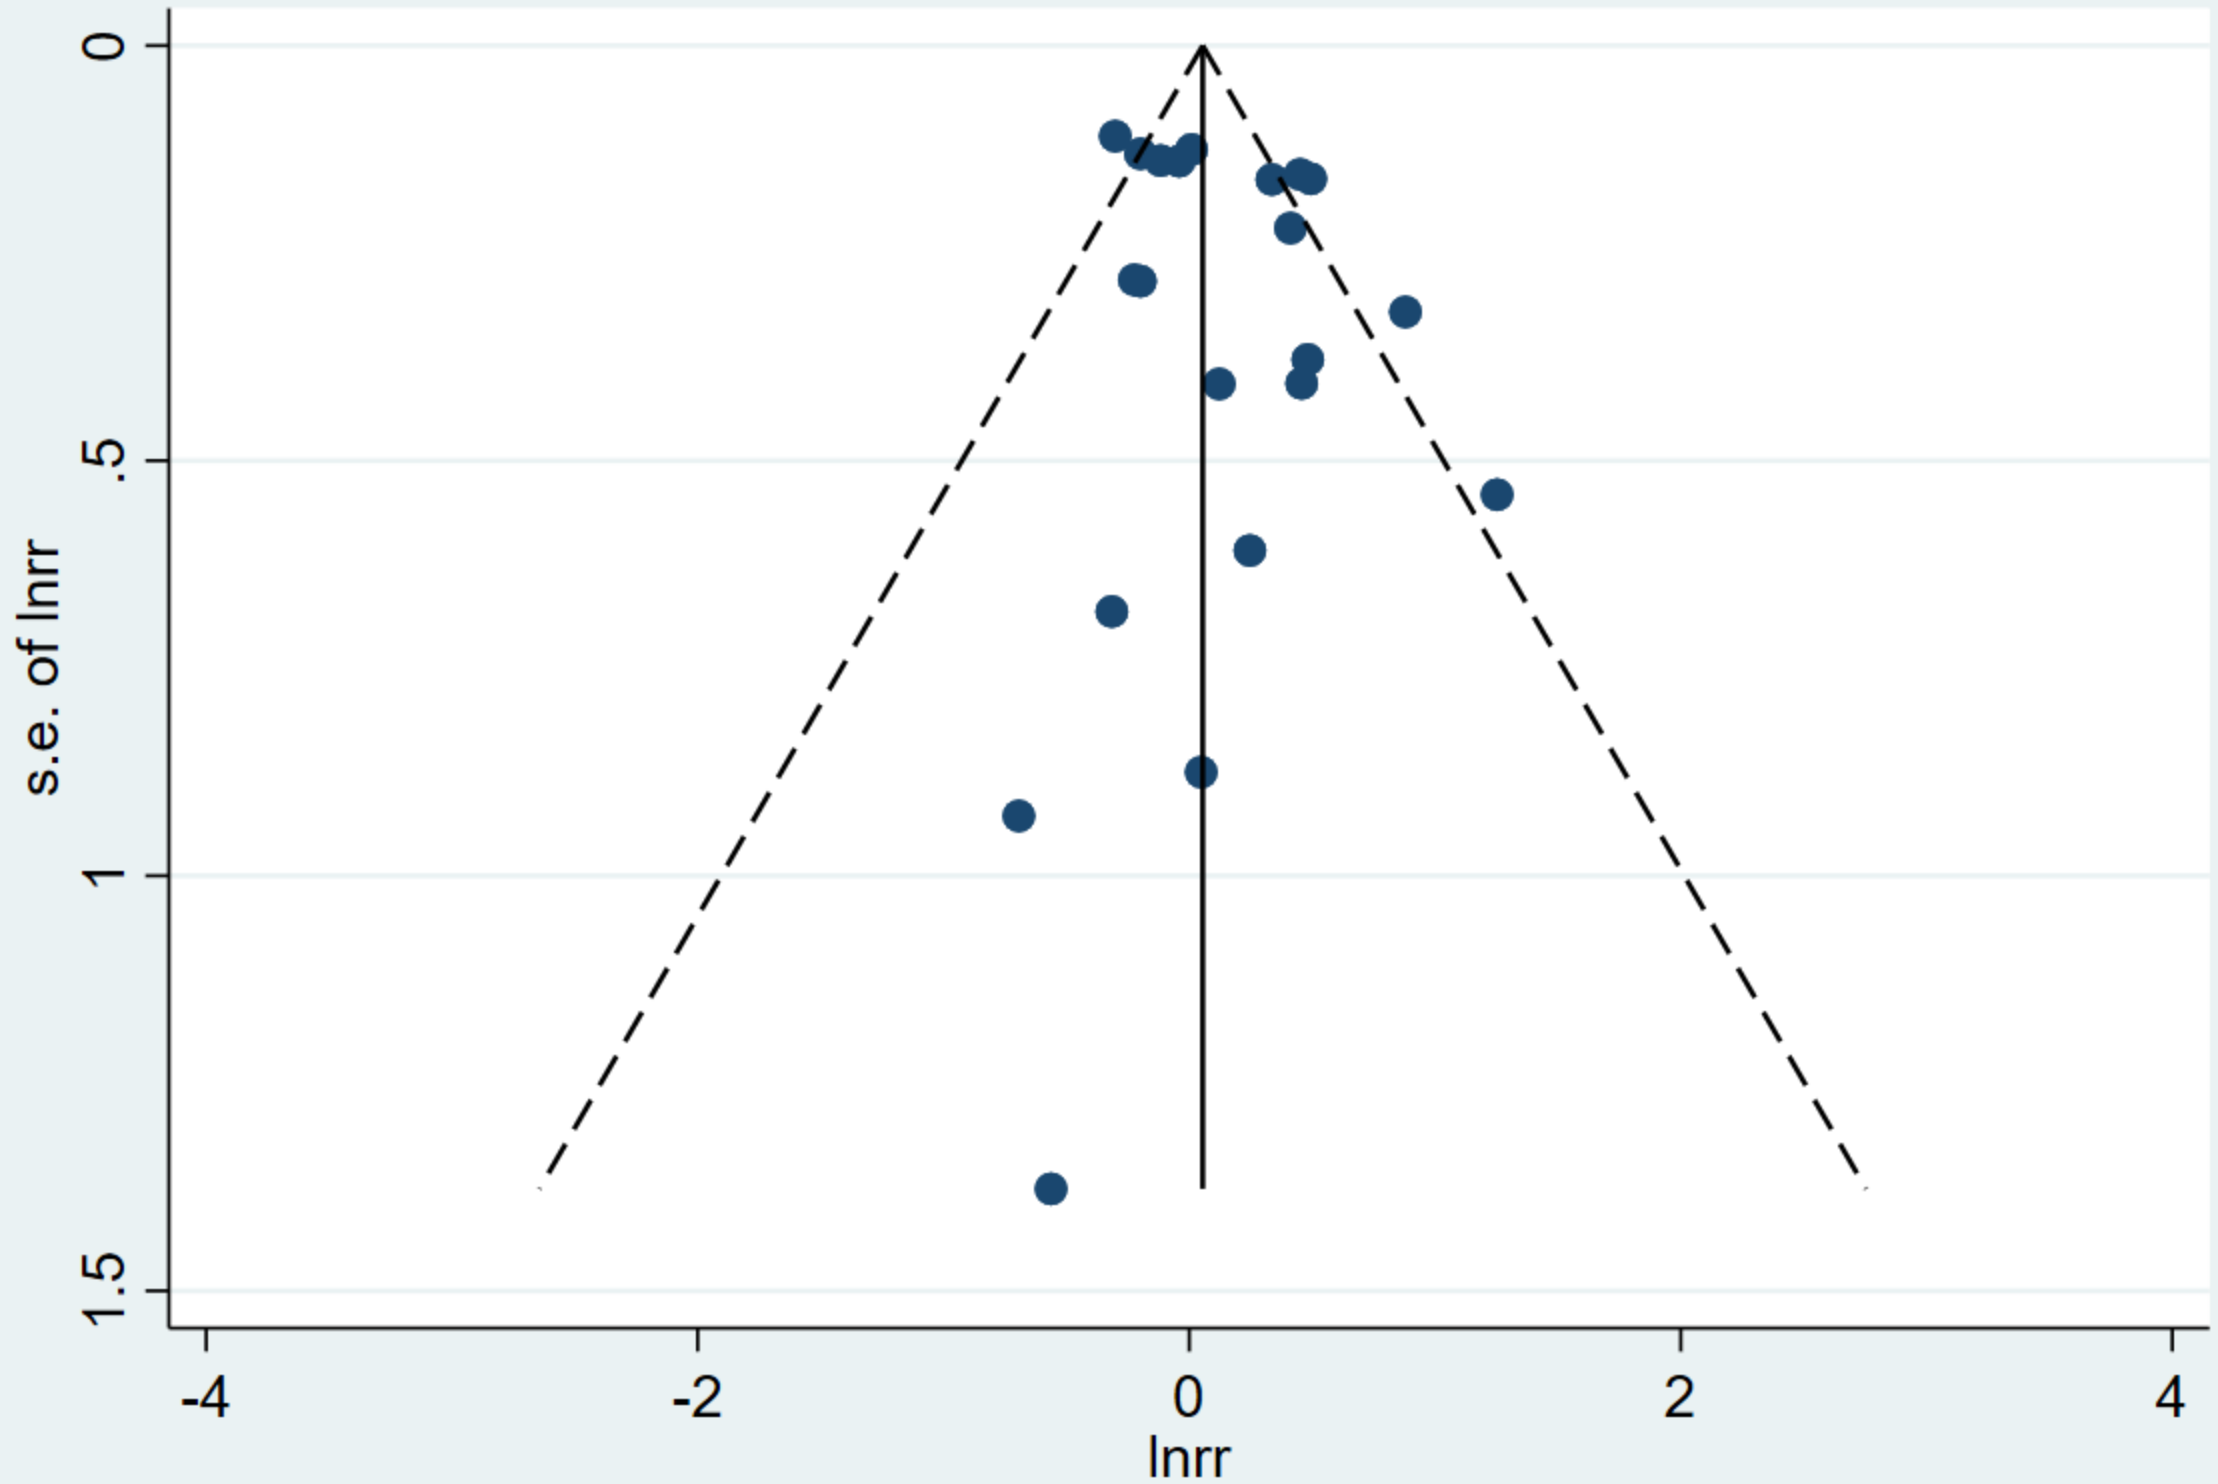

Supplement: supplementary_figure_2.pdf [file supplementary_figure_2.pdf]
